# Supplementary material for: Residents’ perceptions of urban nature and nature-based solutions in Ouagadougou
Source: Frontiers journal article supplement (doi:10.3389/frsc.2024.1487272), 2024-11-22
Supplement: Table_3.XLSX [file Table_3.XLSX]

## Sheet: Data collected June-july 2023
index	Gender	Age	Education	Employment	Income	Birthplace	Visit_frequency	Proximity_UGS	Engagement	ES_DS	Urban_nature_Experience	NbS_benefits	favor_NbS_policies	factors_supporting
336	male	31-50	secondary school	Employed	35,000 - 200,000 XOF	Outside OUA	Rarely	0.5 - 1 km	No	Insecurity & risk of crime	Traditional medicine	Biodiversity	Moderately supportive	Integrated with infrastructure and housing
33	male	18-30	secondary school	Employed	not pronounced	Outside OUA	Rarely	> 2 km	No	Recreation & Walking	Social gatherings	Biodiversity	Moderately supportive	Community involvement
207	male	18-30	university level or above	Employed	not pronounced	Outside OUA	Rarely	> 2 km	No	Biodiversity	Traditional medicine	Biodiversity	Moderately supportive	Integrated with infrastructure and housing
272	male	18-30	secondary school	Student	≤35,000 XOF	Outside OUA	Rarely	> 2 km	No	Food production	Physical activities	Biodiversity	Moderately supportive	Job creation
28	male	31-50	university level or above	Employed	35,000 - 200,000 XOF	Outside OUA	Never	0.5 - 1 km	Yes	Hygiene & sanitation issues	Physical activities	Biodiversity	Moderately supportive	Integrated with infrastructure and housing
174	female	31-50	university level or above	Employed	35,000 - 200,000 XOF	Ouagadougou (OUA)	Never	0.5 - 1 km	Yes	Flood mitigation	Urban agriculture	Biodiversity	Moderately supportive	Community involvement
380	male	31-50	university level or above	Employed	not pronounced	Outside OUA	Never	0.5 - 1 km	Yes	Insecurity & risk of crime	Shade	Biodiversity	Moderately supportive	Integrated with infrastructure and housing
148	male	31-50	secondary school	Employed	35,000 - 200,000 XOF	Ouagadougou (OUA)	Never	> 2 km	Yes	Risk of disease	Physical activities	Biodiversity	Moderately supportive	Integrated with infrastructure and housing
10	male	31-50	secondary school	Employed	35,000 - 200,000 XOF	Ouagadougou (OUA)	Rarely	1 - 2 km	Yes	Food production	Leisure & relaxation	Health/recreation	Moderately supportive	Educational scope
15	female	18-30	secondary school	Employed	35,000 - 200,000 XOF	Ouagadougou (OUA)	Rarely	1 - 2 km	No	Social cohesion	Social gatherings	Health/recreation	Moderately supportive	Ecourage walking /social interaction
23	male	18-30	secondary school	Employed	not pronounced	Outside OUA	Rarely	1 - 2 km	Yes	Hygiene & sanitation issues	Physical activities	Health/recreation	Moderately supportive	Educational scope
42	male	31-50	not attended	Employed	35,000 - 200,000 XOF	Outside OUA	Rarely	1 - 2 km	Yes	Aesthetic	Urban agriculture	Health/recreation	Moderately supportive	Community involvement
46	female	18-30	secondary school	Employed	35,000 - 200,000 XOF	Ouagadougou (OUA)	Rarely	1 - 2 km	No	Insecurity & risk of crime	Physical activities	Health/recreation	Moderately supportive	Ecourage walking /social interaction
79	male	31-50	primary school or below	Employed	35,000 - 200,000 XOF	Outside OUA	Rarely	1 - 2 km	No	Urban cooling	Physical activities	Health/recreation	Moderately supportive	Job creation
84	female	18-30	secondary school	Employed	35,000 - 200,000 XOF	Outside OUA	Rarely	1 - 2 km	No	Food production	Physical activities	Health/recreation	Moderately supportive	Integrated with infrastructure and housing
91	male	18-30	university level or above	Employed	35,000 - 200,000 XOF	Ouagadougou (OUA)	Rarely	1 - 2 km	No	Hygiene & sanitation issues	Leisure & relaxation	Health/recreation	Moderately supportive	Educational scope
95	male	18-30	secondary school	Student	> 200,000 XOF	Outside OUA	Rarely	1 - 2 km	No	Urban cooling	Physical activities	Health/recreation	Moderately supportive	Ecourage walking /social interaction
153	female	31-50	secondary school	Not employed/retired	35,000 - 200,000 XOF	Outside OUA	Rarely	1 - 2 km	Yes	Aesthetic	Household waste storage	Health/recreation	Moderately supportive	Educational scope
162	female	18-30	secondary school	Employed	35,000 - 200,000 XOF	Ouagadougou (OUA)	Rarely	1 - 2 km	No	Insecurity & risk of crime	Urban agriculture	Health/recreation	Moderately supportive	Ecourage walking /social interaction
166	female	18-30	secondary school	Employed	≤35,000 XOF	Outside OUA	Rarely	1 - 2 km	No	Risk of disease	Urban agriculture	Health/recreation	Moderately supportive	Ecourage walking /social interaction
167	male	18-30	secondary school	Student	not pronounced	Outside OUA	Rarely	1 - 2 km	No	Risk of disease	Social gatherings	Health/recreation	Moderately supportive	Ecourage walking /social interaction
168	male	18-30	secondary school	Not employed/retired	≤35,000 XOF	Outside OUA	Rarely	1 - 2 km	No	Flood mitigation	Temporary housing	Health/recreation	Moderately supportive	Ecourage walking /social interaction
173	male	18-30	not pronounced	Employed	≤35,000 XOF	Ouagadougou (OUA)	Rarely	1 - 2 km	No	Risk of disease	Leisure & relaxation	Health/recreation	Moderately supportive	Community involvement
176	male	18-30	secondary school	Employed	not pronounced	Ouagadougou (OUA)	Rarely	1 - 2 km	No	Flood mitigation	Leisure & relaxation	Health/recreation	Moderately supportive	Ecourage walking /social interaction
177	male	18-30	secondary school	Student	35,000 - 200,000 XOF	Ouagadougou (OUA)	Rarely	1 - 2 km	No	Risk of disease	Plants experimental	Health/recreation	Moderately supportive	Ecourage walking /social interaction
178	male	18-30	secondary school	Not employed/retired	≤35,000 XOF	Ouagadougou (OUA)	Rarely	1 - 2 km	No	Hygiene & sanitation issues	Temporary housing	Health/recreation	Moderately supportive	Educational scope
180	male	18-30	secondary school	Employed	≤35,000 XOF	Ouagadougou (OUA)	Rarely	1 - 2 km	No	Flood mitigation	Leisure & relaxation	Health/recreation	Moderately supportive	Job creation
181	male	18-30	secondary school	Student	35,000 - 200,000 XOF	Outside OUA	Rarely	1 - 2 km	No	Hygiene & sanitation issues	Plants experimental	Health/recreation	Moderately supportive	Educational scope
185	male	18-30	secondary school	Student	35,000 - 200,000 XOF	Outside OUA	Rarely	1 - 2 km	Yes	Flood mitigation	Physical activities	Health/recreation	Moderately supportive	Ecourage walking /social interaction
190	male	18-30	university level or above	Student	not pronounced	Outside OUA	Rarely	1 - 2 km	Yes	Hygiene & sanitation issues	Leisure & relaxation	Health/recreation	Moderately supportive	Integrated with infrastructure and housing
223	female	18-30	secondary school	Employed	35,000 - 200,000 XOF	Ouagadougou (OUA)	Rarely	1 - 2 km	No	Insecurity & risk of crime	Physical activities	Health/recreation	Moderately supportive	Educational scope
240	male	18-30	not attended	Employed	35,000 - 200,000 XOF	Outside OUA	Rarely	1 - 2 km	No	Urban cooling	Horticulture	Health/recreation	Moderately supportive	Job creation
268	male	31-50	secondary school	Employed	35,000 - 200,000 XOF	Ouagadougou (OUA)	Rarely	1 - 2 km	No	Biodiversity	Physical activities	Health/recreation	Moderately supportive	Job creation
283	male	18-30	secondary school	Employed	≤35,000 XOF	Outside OUA	Rarely	1 - 2 km	No	Flood mitigation	Physical activities	Health/recreation	Moderately supportive	Job creation
294	male	31-50	not attended	Employed	35,000 - 200,000 XOF	Ouagadougou (OUA)	Rarely	1 - 2 km	No	Urban cooling	Urban agriculture	Health/recreation	Moderately supportive	Job creation
337	male	18-30	not attended	Employed	35,000 - 200,000 XOF	Ouagadougou (OUA)	Rarely	1 - 2 km	No	Social cohesion	Traditional medicine	Health/recreation	Moderately supportive	Community involvement
348	male	18-30	university level or above	Employed	35,000 - 200,000 XOF	Ouagadougou (OUA)	Rarely	1 - 2 km	No	Social cohesion	Social gatherings	Health/recreation	Moderately supportive	Educational scope
350	male	18-30	secondary school	Employed	35,000 - 200,000 XOF	Ouagadougou (OUA)	Rarely	1 - 2 km	Yes	Food production	Social gatherings	Health/recreation	Moderately supportive	Ecourage walking /social interaction
365	male	18-30	secondary school	Employed	35,000 - 200,000 XOF	Ouagadougou (OUA)	Rarely	1 - 2 km	No	Social cohesion	Social gatherings	Health/recreation	Moderately supportive	Educational scope
371	male	31-50	secondary school	Employed	35,000 - 200,000 XOF	Ouagadougou (OUA)	Rarely	1 - 2 km	No	Recreation & Walking	Social gatherings	Health/recreation	Moderately supportive	Ecourage walking /social interaction
374	male	18-30	university level or above	Employed	> 200,000 XOF	Ouagadougou (OUA)	Rarely	1 - 2 km	Yes	Recreation & Walking	Physical activities	Health/recreation	Moderately supportive	Integrated with infrastructure and housing
392	male	18-30	university level or above	Student	35,000 - 200,000 XOF	Ouagadougou (OUA)	Rarely	1 - 2 km	No	Urban cooling	Leisure & relaxation	Health/recreation	Moderately supportive	Ecourage walking /social interaction
398	male	18-30	university level or above	Employed	35,000 - 200,000 XOF	Ouagadougou (OUA)	Rarely	1 - 2 km	No	Hygiene & sanitation issues	Social gatherings	Health/recreation	Moderately supportive	Job creation
16	female	31-50	secondary school	Employed	35,000 - 200,000 XOF	Ouagadougou (OUA)	Rarely	0.5 - 1 km	Yes	Urban cooling	Physical activities	Health/recreation	Moderately supportive	Integrated with infrastructure and housing
26	male	18-30	secondary school	Employed	35,000 - 200,000 XOF	Ouagadougou (OUA)	Rarely	0.5 - 1 km	Yes	Food production	Social gatherings	Health/recreation	Moderately supportive	Integrated with infrastructure and housing
29	female	18-30	university level or above	Student	35,000 - 200,000 XOF	Outside OUA	Rarely	0.5 - 1 km	No	Aesthetic	Horticulture	Health/recreation	Moderately supportive	Integrated with infrastructure and housing
32	female	31-50	secondary school	Employed	> 200,000 XOF	Ouagadougou (OUA)	Rarely	0.5 - 1 km	No	Hygiene & sanitation issues	Temporary housing	Health/recreation	Moderately supportive	Integrated with infrastructure and housing
35	male	31-50	secondary school	Employed	> 200,000 XOF	Outside OUA	Rarely	0.5 - 1 km	No	Hygiene & sanitation issues	Physical activities	Health/recreation	Moderately supportive	Integrated with infrastructure and housing
36	female	18-30	university level or above	Employed	35,000 - 200,000 XOF	Outside OUA	Rarely	0.5 - 1 km	No	Hygiene & sanitation issues	Plants experimental	Health/recreation	Moderately supportive	Ecourage walking /social interaction
38	male	31-50	primary school or below	Employed	35,000 - 200,000 XOF	Outside OUA	Rarely	0.5 - 1 km	No	Food production	Urban agriculture	Health/recreation	Moderately supportive	Community involvement
48	female	18-30	secondary school	Employed	35,000 - 200,000 XOF	Outside OUA	Rarely	0.5 - 1 km	No	Flood mitigation	Social gatherings	Health/recreation	Moderately supportive	Ecourage walking /social interaction
49	male	31-50	not attended	Employed	35,000 - 200,000 XOF	Ouagadougou (OUA)	Rarely	0.5 - 1 km	No	Flood mitigation	Urban agriculture	Health/recreation	Moderately supportive	Community involvement
80	female	18-30	primary school or below	Employed	35,000 - 200,000 XOF	Outside OUA	Rarely	0.5 - 1 km	No	Hygiene & sanitation issues	Horticulture	Health/recreation	Moderately supportive	Educational scope
90	male	31-50	secondary school	Employed	35,000 - 200,000 XOF	Outside OUA	Rarely	0.5 - 1 km	No	Food production	Leisure & relaxation	Health/recreation	Moderately supportive	Ecourage walking /social interaction
201	male	31-50	not pronounced	Employed	not pronounced	Outside OUA	Rarely	0.5 - 1 km	No	Insecurity & risk of crime	Urban agriculture	Health/recreation	Moderately supportive	Community involvement
214	female	31-50	university level or above	Employed	not pronounced	Ouagadougou (OUA)	Rarely	0.5 - 1 km	No	Urban cooling	Plants experimental	Health/recreation	Moderately supportive	Job creation
298	male	18-30	university level or above	Not employed/retired	≤35,000 XOF	Outside OUA	Rarely	0.5 - 1 km	No	Urban cooling	Leisure & relaxation	Health/recreation	Moderately supportive	Job creation
331	male	31-50	university level or above	Not employed/retired	> 200,000 XOF	Ouagadougou (OUA)	Rarely	0.5 - 1 km	Yes	Social cohesion	Shade	Health/recreation	Moderately supportive	Educational scope
388	female	18-30	not attended	Employed	> 200,000 XOF	Ouagadougou (OUA)	Rarely	0.5 - 1 km	No	Aesthetic	Shade	Health/recreation	Moderately supportive	Integrated with infrastructure and housing
21	female	18-30	not attended	Employed	> 200,000 XOF	Outside OUA	Rarely	> 2 km	No	Aesthetic	Leisure & relaxation	Health/recreation	Moderately supportive	Educational scope
41	female	>50	primary school or below	Employed	35,000 - 200,000 XOF	Outside OUA	Rarely	> 2 km	No	Recreation & Walking	Shade	Health/recreation	Moderately supportive	Community involvement
205	male	31-50	not pronounced	Employed	not pronounced	Outside OUA	Rarely	> 2 km	No	Flood mitigation	Traditional medicine	Health/recreation	Moderately supportive	Job creation
230	female	31-50	not attended	Not employed/retired	35,000 - 200,000 XOF	Outside OUA	Rarely	> 2 km	No	Aesthetic	Urban agriculture	Health/recreation	Moderately supportive	Educational scope
260	male	31-50	university level or above	Employed	not pronounced	Ouagadougou (OUA)	Rarely	> 2 km	No	Aesthetic	Traditional medicine	Health/recreation	Moderately supportive	Ecourage walking /social interaction
279	male	18-30	secondary school	Employed	35,000 - 200,000 XOF	Outside OUA	Rarely	> 2 km	No	Food production	Social gatherings	Health/recreation	Moderately supportive	Job creation
290	male	18-30	university level or above	Student	35,000 - 200,000 XOF	Outside OUA	Rarely	> 2 km	No	Aesthetic	Plants experimental	Health/recreation	Moderately supportive	Job creation
327	male	18-30	secondary school	Employed	not pronounced	Ouagadougou (OUA)	Rarely	> 2 km	No	Insecurity & risk of crime	Traditional medicine	Health/recreation	Moderately supportive	Ecourage walking /social interaction
335	male	31-50	secondary school	Employed	35,000 - 200,000 XOF	Ouagadougou (OUA)	Rarely	> 2 km	No	Hygiene & sanitation issues	Traditional medicine	Health/recreation	Moderately supportive	Job creation
58	male	18-30	not pronounced	Employed	not pronounced	Outside OUA	Rarely	< 0.5 km	No	Recreation & Walking	Urban agriculture	Health/recreation	Moderately supportive	Job creation
202	male	31-50	not pronounced	Employed	not pronounced	Ouagadougou (OUA)	Rarely	< 0.5 km	No	Recreation & Walking	Urban agriculture	Health/recreation	Moderately supportive	Job creation
345	male	31-50	secondary school	Employed	35,000 - 200,000 XOF	Ouagadougou (OUA)	Rarely	< 0.5 km	No	Insecurity & risk of crime	Plants experimental	Health/recreation	Moderately supportive	Educational scope
7	female	18-30	secondary school	Employed	35,000 - 200,000 XOF	Ouagadougou (OUA)	Weekly	1 - 2 km	Yes	Food production	Physical activities	stormwater managment	Moderately supportive	Integrated with infrastructure and housing
14	male	18-30	university level or above	Student	35,000 - 200,000 XOF	Ouagadougou (OUA)	Weekly	1 - 2 km	Yes	Social cohesion	Physical activities	stormwater managment	Moderately supportive	Educational scope
142	male	31-50	university level or above	Not employed/retired	35,000 - 200,000 XOF	Ouagadougou (OUA)	Weekly	1 - 2 km	Yes	Hygiene & sanitation issues	Physical activities	stormwater managment	Moderately supportive	Ecourage walking /social interaction
150	female	18-30	secondary school	Student	not pronounced	Ouagadougou (OUA)	Weekly	1 - 2 km	No	Flood mitigation	Urban agriculture	stormwater managment	Moderately supportive	Ecourage walking /social interaction
164	male	31-50	secondary school	Employed	35,000 - 200,000 XOF	Ouagadougou (OUA)	Weekly	1 - 2 km	Yes	Risk of disease	Leisure & relaxation	stormwater managment	Moderately supportive	Integrated with infrastructure and housing
224	male	18-30	university level or above	Employed	35,000 - 200,000 XOF	Outside OUA	Weekly	1 - 2 km	Yes	Insecurity & risk of crime	Plants experimental	stormwater managment	Moderately supportive	Educational scope
266	male	31-50	secondary school	Employed	not pronounced	Outside OUA	Weekly	1 - 2 km	No	Biodiversity	Social gatherings	stormwater managment	Moderately supportive	Ecourage walking /social interaction
309	male	31-50	secondary school	Employed	≤35,000 XOF	Ouagadougou (OUA)	Weekly	1 - 2 km	No	Biodiversity	Social gatherings	stormwater managment	Moderately supportive	Job creation
332	male	31-50	secondary school	Employed	> 200,000 XOF	Ouagadougou (OUA)	Weekly	1 - 2 km	Yes	Social cohesion	Physical activities	stormwater managment	Moderately supportive	Ecourage walking /social interaction
17	female	31-50	not pronounced	Employed	not pronounced	Outside OUA	Weekly	0.5 - 1 km	Yes	Urban cooling	Urban agriculture	stormwater managment	Moderately supportive	Educational scope
31	female	18-30	secondary school	Employed	35,000 - 200,000 XOF	Outside OUA	Weekly	0.5 - 1 km	Yes	Hygiene & sanitation issues	Social gatherings	stormwater managment	Moderately supportive	Integrated with infrastructure and housing
37	male	18-30	secondary school	Employed	> 200,000 XOF	Ouagadougou (OUA)	Weekly	0.5 - 1 km	Yes	Hygiene & sanitation issues	Physical activities	stormwater managment	Moderately supportive	Integrated with infrastructure and housing
39	female	18-30	secondary school	Employed	35,000 - 200,000 XOF	Outside OUA	Weekly	0.5 - 1 km	Yes	Food production	Household waste storage	stormwater managment	Moderately supportive	Educational scope
44	male	18-30	secondary school	Employed	> 200,000 XOF	Outside OUA	Weekly	0.5 - 1 km	Yes	Food production	Social gatherings	stormwater managment	Moderately supportive	Ecourage walking /social interaction
50	male	18-30	primary school or below	Employed	35,000 - 200,000 XOF	Ouagadougou (OUA)	Weekly	0.5 - 1 km	Yes	Flood mitigation	Physical activities	stormwater managment	Moderately supportive	Educational scope
157	male	18-30	university level or above	Employed	35,000 - 200,000 XOF	Ouagadougou (OUA)	Weekly	0.5 - 1 km	No	Urban cooling	Physical activities	stormwater managment	Moderately supportive	Integrated with infrastructure and housing
160	male	18-30	university level or above	Student	≤35,000 XOF	Outside OUA	Weekly	0.5 - 1 km	No	Urban cooling	Social gatherings	stormwater managment	Moderately supportive	Integrated with infrastructure and housing
182	female	18-30	university level or above	Employed	35,000 - 200,000 XOF	Outside OUA	Weekly	0.5 - 1 km	Yes	Food production	Leisure & relaxation	stormwater managment	Moderately supportive	Educational scope
86	male	31-50	university level or above	Employed	> 200,000 XOF	Ouagadougou (OUA)	Weekly	> 2 km	No	Aesthetic	Physical activities	stormwater managment	Moderately supportive	Job creation
1	male	18-30	secondary school	Employed	35,000 - 200,000 XOF	Ouagadougou (OUA)	Monthly	1 - 2 km	Yes	Recreation & Walking	Social gatherings	Urban heat reduction	Moderately supportive	Ecourage walking /social interaction
4	male	>50	secondary school	Student	≤35,000 XOF	Ouagadougou (OUA)	Monthly	1 - 2 km	No	Recreation & Walking	Traditional medicine	Urban heat reduction	Moderately supportive	Ecourage walking /social interaction
22	female	18-30	not attended	Not employed/retired	≤35,000 XOF	Ouagadougou (OUA)	Monthly	1 - 2 km	No	Food production	Household waste storage	Urban heat reduction	Moderately supportive	Job creation
59	male	18-30	not pronounced	Employed	not pronounced	Ouagadougou (OUA)	Monthly	1 - 2 km	No	Hygiene & sanitation issues	Urban agriculture	Urban heat reduction	Moderately supportive	Job creation
116	male	18-30	secondary school	Student	not pronounced	Outside OUA	Monthly	1 - 2 km	No	Hygiene & sanitation issues	Leisure & relaxation	Urban heat reduction	Moderately supportive	Ecourage walking /social interaction
117	male	18-30	secondary school	Employed	not pronounced	Ouagadougou (OUA)	Monthly	1 - 2 km	No	Hygiene & sanitation issues	Leisure & relaxation	Urban heat reduction	Moderately supportive	Job creation
120	male	18-30	secondary school	Employed	35,000 - 200,000 XOF	Ouagadougou (OUA)	Monthly	1 - 2 km	No	Social cohesion	Leisure & relaxation	Urban heat reduction	Moderately supportive	Job creation
121	female	>50	secondary school	Student	not pronounced	Outside OUA	Monthly	1 - 2 km	No	Risk of disease	Urban agriculture	Urban heat reduction	Moderately supportive	Job creation
122	male	18-30	secondary school	Employed	35,000 - 200,000 XOF	Outside OUA	Monthly	1 - 2 km	Yes	Hygiene & sanitation issues	Leisure & relaxation	Urban heat reduction	Moderately supportive	Job creation
125	male	18-30	university level or above	Student	not pronounced	Ouagadougou (OUA)	Monthly	1 - 2 km	No	Hygiene & sanitation issues	Leisure & relaxation	Urban heat reduction	Moderately supportive	Ecourage walking /social interaction
126	male	18-30	university level or above	Student	35,000 - 200,000 XOF	Ouagadougou (OUA)	Monthly	1 - 2 km	No	Hygiene & sanitation issues	Leisure & relaxation	Urban heat reduction	Moderately supportive	Job creation
130	male	18-30	not attended	Employed	35,000 - 200,000 XOF	Outside OUA	Monthly	1 - 2 km	No	Hygiene & sanitation issues	Physical activities	Urban heat reduction	Moderately supportive	Job creation
134	male	18-30	not attended	Employed	35,000 - 200,000 XOF	Outside OUA	Never	1 - 2 km	No	Hygiene & sanitation issues	Horticulture	Urban heat reduction	Moderately supportive	Job creation
135	female	18-30	secondary school	Student	not pronounced	Ouagadougou (OUA)	Monthly	1 - 2 km	No	Hygiene & sanitation issues	Leisure & relaxation	Urban heat reduction	Moderately supportive	Job creation
137	male	18-30	not attended	Employed	not pronounced	Ouagadougou (OUA)	Monthly	1 - 2 km	No	Social cohesion	Horticulture	Urban heat reduction	Moderately supportive	Job creation
149	male	18-30	university level or above	Employed	35,000 - 200,000 XOF	Outside OUA	Monthly	1 - 2 km	No	Flood mitigation	Leisure & relaxation	Urban heat reduction	Moderately supportive	Ecourage walking /social interaction
171	female	18-30	secondary school	Not employed/retired	≤35,000 XOF	Ouagadougou (OUA)	Never	1 - 2 km	No	Flood mitigation	Traditional medicine	Urban heat reduction	Moderately supportive	Ecourage walking /social interaction
227	male	18-30	not pronounced	Employed	35,000 - 200,000 XOF	Outside OUA	Never	1 - 2 km	No	Risk of disease	Physical activities	Urban heat reduction	Moderately supportive	Integrated with infrastructure and housing
233	male	18-30	secondary school	Employed	not pronounced	Ouagadougou (OUA)	Monthly	1 - 2 km	No	Insecurity & risk of crime	Traditional medicine	Urban heat reduction	Moderately supportive	Educational scope
237	female	18-30	university level or above	Student	≤35,000 XOF	Outside OUA	Monthly	1 - 2 km	No	Biodiversity	Social gatherings	Urban heat reduction	Moderately supportive	Job creation
238	male	18-30	not attended	Employed	35,000 - 200,000 XOF	Outside OUA	Monthly	1 - 2 km	No	Insecurity & risk of crime	Traditional medicine	Urban heat reduction	Moderately supportive	Community involvement
244	male	18-30	secondary school	Employed	35,000 - 200,000 XOF	Outside OUA	Monthly	1 - 2 km	Yes	Urban cooling	Physical activities	Urban heat reduction	Moderately supportive	Ecourage walking /social interaction
251	male	18-30	university level or above	Employed	35,000 - 200,000 XOF	Ouagadougou (OUA)	Monthly	1 - 2 km	No	Biodiversity	Social gatherings	Urban heat reduction	Moderately supportive	Ecourage walking /social interaction
255	male	18-30	university level or above	Student	≤35,000 XOF	Outside OUA	Monthly	1 - 2 km	No	Urban cooling	Social gatherings	Urban heat reduction	Moderately supportive	Integrated with infrastructure and housing
270	male	31-50	university level or above	Employed	35,000 - 200,000 XOF	Ouagadougou (OUA)	Monthly	1 - 2 km	No	Urban cooling	Physical activities	Urban heat reduction	Moderately supportive	Ecourage walking /social interaction
281	male	18-30	secondary school	Student	not pronounced	Outside OUA	Monthly	1 - 2 km	No	Flood mitigation	Physical activities	Urban heat reduction	Moderately supportive	Ecourage walking /social interaction
284	male	18-30	university level or above	Employed	35,000 - 200,000 XOF	Outside OUA	Monthly	1 - 2 km	No	Urban cooling	Social gatherings	Urban heat reduction	Moderately supportive	Integrated with infrastructure and housing
318	male	18-30	secondary school	Student	not pronounced	Ouagadougou (OUA)	Monthly	1 - 2 km	No	Biodiversity	Physical activities	Urban heat reduction	Moderately supportive	Ecourage walking /social interaction
324	female	18-30	university level or above	Employed	35,000 - 200,000 XOF	Ouagadougou (OUA)	Monthly	1 - 2 km	Yes	Social cohesion	Social gatherings	Urban heat reduction	Moderately supportive	Job creation
325	male	18-30	secondary school	Employed	35,000 - 200,000 XOF	Ouagadougou (OUA)	Monthly	1 - 2 km	Yes	Risk of disease	Social gatherings	Urban heat reduction	Moderately supportive	Job creation
328	male	18-30	not attended	Employed	35,000 - 200,000 XOF	Outside OUA	Monthly	1 - 2 km	No	Social cohesion	Traditional medicine	Urban heat reduction	Moderately supportive	Job creation
329	male	31-50	not attended	Employed	35,000 - 200,000 XOF	Ouagadougou (OUA)	Monthly	1 - 2 km	No	Social cohesion	Traditional medicine	Urban heat reduction	Moderately supportive	Educational scope
333	male	31-50	secondary school	Employed	35,000 - 200,000 XOF	Ouagadougou (OUA)	Weekly	1 - 2 km	Yes	Social cohesion	Plants experimental	Urban heat reduction	Moderately supportive	Ecourage walking /social interaction
340	female	31-50	not attended	Employed	35,000 - 200,000 XOF	Ouagadougou (OUA)	Monthly	1 - 2 km	No	Social cohesion	Traditional medicine	Urban heat reduction	Moderately supportive	Community involvement
341	male	18-30	secondary school	Employed	35,000 - 200,000 XOF	Ouagadougou (OUA)	Monthly	1 - 2 km	No	Food production	Plants experimental	Urban heat reduction	Moderately supportive	Ecourage walking /social interaction
342	male	18-30	secondary school	Employed	35,000 - 200,000 XOF	Outside OUA	Monthly	1 - 2 km	No	Social cohesion	Plants experimental	Urban heat reduction	Moderately supportive	Ecourage walking /social interaction
343	female	18-30	secondary school	Employed	35,000 - 200,000 XOF	Ouagadougou (OUA)	Monthly	1 - 2 km	No	Flood mitigation	Social gatherings	Urban heat reduction	Moderately supportive	Ecourage walking /social interaction
346	female	18-30	secondary school	Employed	35,000 - 200,000 XOF	Outside OUA	Monthly	1 - 2 km	Yes	Flood mitigation	Social gatherings	Urban heat reduction	Moderately supportive	Educational scope
351	male	18-30	secondary school	Employed	35,000 - 200,000 XOF	Outside OUA	Monthly	1 - 2 km	No	Food production	Traditional medicine	Urban heat reduction	Moderately supportive	Ecourage walking /social interaction
354	male	18-30	secondary school	Employed	≤35,000 XOF	Ouagadougou (OUA)	Monthly	1 - 2 km	No	Social cohesion	Plants experimental	Urban heat reduction	Moderately supportive	Educational scope
355	male	18-30	not attended	Employed	35,000 - 200,000 XOF	Outside OUA	Monthly	1 - 2 km	No	Social cohesion	Social gatherings	Urban heat reduction	Moderately supportive	Community involvement
358	male	18-30	secondary school	Employed	35,000 - 200,000 XOF	Ouagadougou (OUA)	Monthly	1 - 2 km	Yes	Social cohesion	Social gatherings	Urban heat reduction	Moderately supportive	Educational scope
359	male	18-30	not attended	Employed	35,000 - 200,000 XOF	Ouagadougou (OUA)	Monthly	1 - 2 km	No	Food production	Traditional medicine	Urban heat reduction	Moderately supportive	Educational scope
361	female	31-50	secondary school	Employed	35,000 - 200,000 XOF	Ouagadougou (OUA)	Monthly	1 - 2 km	No	Food production	Traditional medicine	Urban heat reduction	Moderately supportive	Ecourage walking /social interaction
362	male	18-30	not attended	Employed	≤35,000 XOF	Outside OUA	Monthly	1 - 2 km	No	Social cohesion	Shade	Urban heat reduction	Moderately supportive	Community involvement
364	female	18-30	secondary school	Employed	35,000 - 200,000 XOF	Ouagadougou (OUA)	Monthly	1 - 2 km	No	Food production	Social gatherings	Urban heat reduction	Moderately supportive	Ecourage walking /social interaction
367	female	18-30	secondary school	Employed	≤35,000 XOF	Outside OUA	Monthly	1 - 2 km	Yes	Aesthetic	Social gatherings	Urban heat reduction	Moderately supportive	Ecourage walking /social interaction
370	female	18-30	secondary school	Employed	≤35,000 XOF	Ouagadougou (OUA)	Monthly	1 - 2 km	No	Aesthetic	Social gatherings	Urban heat reduction	Moderately supportive	Ecourage walking /social interaction
372	female	31-50	not attended	Not employed/retired	≤35,000 XOF	Ouagadougou (OUA)	Monthly	1 - 2 km	No	Aesthetic	Traditional medicine	Urban heat reduction	Moderately supportive	Educational scope
373	male	>50	secondary school	Student	≤35,000 XOF	Outside OUA	Monthly	1 - 2 km	No	Recreation & Walking	Physical activities	Urban heat reduction	Moderately supportive	Educational scope
376	male	18-30	secondary school	Employed	35,000 - 200,000 XOF	Ouagadougou (OUA)	Monthly	1 - 2 km	No	Food production	Social gatherings	Urban heat reduction	Moderately supportive	Ecourage walking /social interaction
382	female	18-30	not pronounced	Employed	> 200,000 XOF	Ouagadougou (OUA)	Monthly	1 - 2 km	No	Aesthetic	Urban agriculture	Urban heat reduction	Moderately supportive	Community involvement
395	female	18-30	not pronounced	Student	35,000 - 200,000 XOF	Outside OUA	Monthly	1 - 2 km	No	Biodiversity	Social gatherings	Urban heat reduction	Moderately supportive	Integrated with infrastructure and housing
13	male	31-50	not attended	Employed	35,000 - 200,000 XOF	Ouagadougou (OUA)	Monthly	0.5 - 1 km	Yes	Food production	Urban agriculture	Urban heat reduction	Moderately supportive	Integrated with infrastructure and housing
97	male	18-30	not attended	Employed	35,000 - 200,000 XOF	Outside OUA	Monthly	0.5 - 1 km	No	Urban cooling	Horticulture	Urban heat reduction	Moderately supportive	Community involvement
128	male	18-30	secondary school	Employed	not pronounced	Ouagadougou (OUA)	Monthly	0.5 - 1 km	No	Insecurity & risk of crime	Leisure & relaxation	Urban heat reduction	Moderately supportive	Ecourage walking /social interaction
189	male	18-30	university level or above	Employed	not pronounced	Outside OUA	Monthly	0.5 - 1 km	No	Insecurity & risk of crime	Leisure & relaxation	Urban heat reduction	Moderately supportive	Ecourage walking /social interaction
204	female	18-30	secondary school	Employed	not pronounced	Ouagadougou (OUA)	Monthly	0.5 - 1 km	No	Food production	Traditional medicine	Urban heat reduction	Moderately supportive	Job creation
228	male	18-30	university level or above	Employed	> 200,000 XOF	Ouagadougou (OUA)	Monthly	0.5 - 1 km	Yes	Aesthetic	Physical activities	Urban heat reduction	Moderately supportive	Integrated with infrastructure and housing
239	male	31-50	secondary school	Employed	35,000 - 200,000 XOF	Ouagadougou (OUA)	Monthly	0.5 - 1 km	No	Flood mitigation	Plants experimental	Urban heat reduction	Moderately supportive	Integrated with infrastructure and housing
247	male	18-30	secondary school	Student	not pronounced	Outside OUA	Monthly	0.5 - 1 km	No	Social cohesion	Physical activities	Urban heat reduction	Moderately supportive	Ecourage walking /social interaction
271	male	18-30	primary school or below	Employed	35,000 - 200,000 XOF	Outside OUA	Monthly	0.5 - 1 km	No	Social cohesion	Urban agriculture	Urban heat reduction	Moderately supportive	Job creation
301	male	18-30	secondary school	Employed	35,000 - 200,000 XOF	Ouagadougou (OUA)	Monthly	0.5 - 1 km	No	Aesthetic	Social gatherings	Urban heat reduction	Moderately supportive	Ecourage walking /social interaction
352	male	18-30	not attended	Employed	35,000 - 200,000 XOF	Ouagadougou (OUA)	Monthly	0.5 - 1 km	No	Social cohesion	Shade	Urban heat reduction	Moderately supportive	Community involvement
357	male	18-30	secondary school	Employed	35,000 - 200,000 XOF	Ouagadougou (OUA)	Monthly	0.5 - 1 km	No	Insecurity & risk of crime	Traditional medicine	Urban heat reduction	Moderately supportive	Educational scope
366	female	18-30	university level or above	Student	≤35,000 XOF	Ouagadougou (OUA)	Monthly	0.5 - 1 km	Yes	Food production	Plants experimental	Urban heat reduction	Moderately supportive	Educational scope
368	male	31-50	secondary school	Not employed/retired	35,000 - 200,000 XOF	Ouagadougou (OUA)	Monthly	0.5 - 1 km	No	Social cohesion	Leisure & relaxation	Urban heat reduction	Moderately supportive	Ecourage walking /social interaction
19	male	18-30	primary school or below	Employed	≤35,000 XOF	Outside OUA	Monthly	> 2 km	Yes	Recreation & Walking	Leisure & relaxation	Urban heat reduction	Moderately supportive	Community involvement
53	male	31-50	not pronounced	Employed	not pronounced	Outside OUA	Monthly	> 2 km	No	Food production	Shade	Urban heat reduction	Moderately supportive	Integrated with infrastructure and housing
77	male	18-30	not attended	Employed	35,000 - 200,000 XOF	Outside OUA	Monthly	> 2 km	No	Flood mitigation	Horticulture	Urban heat reduction	Moderately supportive	Community involvement
131	female	18-30	secondary school	Student	not pronounced	Ouagadougou (OUA)	Monthly	> 2 km	No	Social cohesion	Leisure & relaxation	Urban heat reduction	Moderately supportive	Job creation
133	male	18-30	university level or above	Employed	35,000 - 200,000 XOF	Ouagadougou (OUA)	Monthly	> 2 km	No	Hygiene & sanitation issues	Physical activities	Urban heat reduction	Moderately supportive	Job creation
170	male	18-30	not attended	Not employed/retired	≤35,000 XOF	Outside OUA	Weekly	> 2 km	No	Flood mitigation	Temporary housing	Urban heat reduction	Moderately supportive	Community involvement
184	male	18-30	university level or above	Employed	not pronounced	Outside OUA	Weekly	> 2 km	No	Risk of disease	Leisure & relaxation	Urban heat reduction	Moderately supportive	Ecourage walking /social interaction
188	male	31-50	not pronounced	Employed	not pronounced	Outside OUA	Monthly	> 2 km	No	Risk of disease	Shade	Urban heat reduction	Moderately supportive	Job creation
213	male	18-30	university level or above	Student	not pronounced	Outside OUA	Monthly	> 2 km	Yes	Aesthetic	Physical activities	Urban heat reduction	Moderately supportive	Job creation
217	male	31-50	secondary school	Employed	35,000 - 200,000 XOF	Outside OUA	Monthly	> 2 km	No	Risk of disease	Physical activities	Urban heat reduction	Moderately supportive	Ecourage walking /social interaction
242	female	18-30	university level or above	Not employed/retired	not pronounced	Outside OUA	Monthly	> 2 km	No	Recreation & Walking	Traditional medicine	Urban heat reduction	Moderately supportive	Job creation
254	male	31-50	university level or above	Employed	not pronounced	Outside OUA	Monthly	> 2 km	No	Insecurity & risk of crime	Shade	Urban heat reduction	Moderately supportive	Ecourage walking /social interaction
261	male	18-30	primary school or below	Employed	not pronounced	Ouagadougou (OUA)	Monthly	> 2 km	No	Biodiversity	Horticulture	Urban heat reduction	Moderately supportive	Educational scope
273	female	18-30	secondary school	Employed	35,000 - 200,000 XOF	Ouagadougou (OUA)	Monthly	> 2 km	No	Urban cooling	Physical activities	Urban heat reduction	Moderately supportive	Job creation
274	male	18-30	not attended	Employed	≤35,000 XOF	Ouagadougou (OUA)	Monthly	> 2 km	No	Biodiversity	Urban agriculture	Urban heat reduction	Moderately supportive	Job creation
277	male	18-30	secondary school	Employed	≤35,000 XOF	Outside OUA	Monthly	> 2 km	No	Recreation & Walking	Social gatherings	Urban heat reduction	Moderately supportive	Job creation
289	male	>50	secondary school	Student	≤35,000 XOF	Ouagadougou (OUA)	Monthly	> 2 km	No	Hygiene & sanitation issues	Horticulture	Urban heat reduction	Moderately supportive	Job creation
299	male	18-30	secondary school	Student	≤35,000 XOF	Ouagadougou (OUA)	Monthly	> 2 km	No	Food production	Social gatherings	Urban heat reduction	Moderately supportive	Ecourage walking /social interaction
310	male	18-30	university level or above	Student	≤35,000 XOF	Outside OUA	Monthly	> 2 km	No	Aesthetic	Social gatherings	Urban heat reduction	Moderately supportive	Educational scope
334	male	18-30	secondary school	Employed	35,000 - 200,000 XOF	Ouagadougou (OUA)	Never	> 2 km	No	Hygiene & sanitation issues	Plants experimental	Urban heat reduction	Moderately supportive	Ecourage walking /social interaction
338	female	18-30	secondary school	Employed	35,000 - 200,000 XOF	Ouagadougou (OUA)	Monthly	> 2 km	No	Recreation & Walking	Plants experimental	Urban heat reduction	Moderately supportive	Ecourage walking /social interaction
369	male	18-30	not attended	Employed	≤35,000 XOF	Ouagadougou (OUA)	Monthly	> 2 km	No	Hygiene & sanitation issues	Social gatherings	Urban heat reduction	Moderately supportive	Community involvement
54	male	18-30	university level or above	Student	not pronounced	Outside OUA	Monthly	< 0.5 km	No	Social cohesion	Social gatherings	Urban heat reduction	Moderately supportive	Job creation
70	male	31-50	not pronounced	Employed	35,000 - 200,000 XOF	Outside OUA	Monthly	< 0.5 km	No	Risk of disease	Physical activities	Urban heat reduction	Moderately supportive	Job creation
71	female	31-50	not pronounced	Employed	not pronounced	Outside OUA	Monthly	< 0.5 km	No	Biodiversity	Traditional medicine	Urban heat reduction	Moderately supportive	Job creation
105	female	>50	secondary school	Student	not pronounced	Ouagadougou (OUA)	Monthly	< 0.5 km	No	Urban cooling	Urban agriculture	Urban heat reduction	Moderately supportive	Ecourage walking /social interaction
108	male	18-30	secondary school	Employed	35,000 - 200,000 XOF	Ouagadougou (OUA)	Weekly	< 0.5 km	No	Hygiene & sanitation issues	Leisure & relaxation	Urban heat reduction	Moderately supportive	Ecourage walking /social interaction
109	male	18-30	secondary school	Employed	35,000 - 200,000 XOF	Outside OUA	Monthly	< 0.5 km	No	Urban cooling	Leisure & relaxation	Urban heat reduction	Moderately supportive	Ecourage walking /social interaction
111	male	31-50	university level or above	Employed	35,000 - 200,000 XOF	Outside OUA	Weekly	< 0.5 km	No	Urban cooling	Leisure & relaxation	Urban heat reduction	Moderately supportive	Ecourage walking /social interaction
112	male	18-30	secondary school	Employed	not pronounced	Outside OUA	Weekly	< 0.5 km	No	Urban cooling	Leisure & relaxation	Urban heat reduction	Moderately supportive	Ecourage walking /social interaction
114	male	18-30	secondary school	Employed	35,000 - 200,000 XOF	Outside OUA	Weekly	< 0.5 km	No	Social cohesion	Leisure & relaxation	Urban heat reduction	Moderately supportive	Ecourage walking /social interaction
115	male	18-30	secondary school	Student	not pronounced	Ouagadougou (OUA)	Monthly	< 0.5 km	No	Hygiene & sanitation issues	Leisure & relaxation	Urban heat reduction	Moderately supportive	Ecourage walking /social interaction
212	female	18-30	not attended	Not employed/retired	not pronounced	Ouagadougou (OUA)	Monthly	< 0.5 km	No	Recreation & Walking	Household waste storage	Urban heat reduction	Moderately supportive	Job creation
258	male	18-30	primary school or below	Employed	not pronounced	Ouagadougou (OUA)	Monthly	< 0.5 km	No	Insecurity & risk of crime	Horticulture	Urban heat reduction	Moderately supportive	Job creation
312	male	18-30	university level or above	Employed	≤35,000 XOF	Outside OUA	Never	< 0.5 km	No	Social cohesion	Plants experimental	Urban heat reduction	Moderately supportive	Job creation
320	male	18-30	secondary school	Employed	35,000 - 200,000 XOF	Ouagadougou (OUA)	Never	< 0.5 km	No	Aesthetic	Social gatherings	Urban heat reduction	Moderately supportive	Job creation
344	male	18-30	not attended	Employed	> 200,000 XOF	Ouagadougou (OUA)	Monthly	< 0.5 km	No	Social cohesion	Traditional medicine	Urban heat reduction	Moderately supportive	Community involvement
353	male	18-30	secondary school	Employed	35,000 - 200,000 XOF	Ouagadougou (OUA)	Monthly	< 0.5 km	No	Hygiene & sanitation issues	Traditional medicine	Urban heat reduction	Moderately supportive	Educational scope
375	female	18-30	secondary school	Employed	35,000 - 200,000 XOF	Ouagadougou (OUA)	Monthly	< 0.5 km	No	Insecurity & risk of crime	Social gatherings	Urban heat reduction	Moderately supportive	Educational scope
379	male	18-30	not pronounced	Employed	not pronounced	Ouagadougou (OUA)	Monthly	< 0.5 km	No	Insecurity & risk of crime	Social gatherings	Urban heat reduction	Moderately supportive	Integrated with infrastructure and housing
394	male	18-30	secondary school	Student	≤35,000 XOF	Outside OUA	Monthly	< 0.5 km	No	Aesthetic	Social gatherings	Urban heat reduction	Moderately supportive	Ecourage walking /social interaction
11	female	18-30	secondary school	Employed	35,000 - 200,000 XOF	Ouagadougou (OUA)	Daily	1 - 2 km	No	Urban cooling	Physical activities	Ressources production	Moderately supportive	Educational scope
12	male	18-30	not attended	Employed	35,000 - 200,000 XOF	Ouagadougou (OUA)	Daily	1 - 2 km	No	Food production	Physical activities	Ressources production	Moderately supportive	Community involvement
18	female	18-30	secondary school	Employed	≤35,000 XOF	Ouagadougou (OUA)	Daily	1 - 2 km	No	Social cohesion	Urban agriculture	Ressources production	Moderately supportive	Community involvement
20	male	31-50	secondary school	Employed	35,000 - 200,000 XOF	Ouagadougou (OUA)	Daily	1 - 2 km	No	Urban cooling	Leisure & relaxation	Ressources production	Moderately supportive	Integrated with infrastructure and housing
25	male	18-30	secondary school	Employed	35,000 - 200,000 XOF	Ouagadougou (OUA)	Daily	1 - 2 km	No	Flood mitigation	Physical activities	Ressources production	Moderately supportive	Community involvement
73	male	18-30	secondary school	Student	35,000 - 200,000 XOF	Outside OUA	Daily	1 - 2 km	Yes	Aesthetic	Physical activities	Ressources production	Moderately supportive	Community involvement
76	male	31-50	secondary school	Employed	35,000 - 200,000 XOF	Ouagadougou (OUA)	Daily	1 - 2 km	No	Urban cooling	Leisure & relaxation	Ressources production	Moderately supportive	Job creation
85	male	31-50	primary school or below	Employed	35,000 - 200,000 XOF	Ouagadougou (OUA)	Daily	1 - 2 km	No	Hygiene & sanitation issues	Urban agriculture	Ressources production	Moderately supportive	Educational scope
110	female	18-30	university level or above	Student	not pronounced	Ouagadougou (OUA)	Daily	1 - 2 km	Yes	Food production	Leisure & relaxation	Ressources production	Moderately supportive	Community involvement
139	male	>50	secondary school	Student	not pronounced	Outside OUA	Daily	1 - 2 km	No	Hygiene & sanitation issues	Social gatherings	Ressources production	Moderately supportive	Community involvement
141	male	31-50	university level or above	Employed	35,000 - 200,000 XOF	Ouagadougou (OUA)	Daily	1 - 2 km	No	Hygiene & sanitation issues	Leisure & relaxation	Ressources production	Moderately supportive	Community involvement
145	female	31-50	university level or above	Employed	35,000 - 200,000 XOF	Ouagadougou (OUA)	Daily	1 - 2 km	Yes	Social cohesion	Physical activities	Ressources production	Moderately supportive	Educational scope
155	female	31-50	secondary school	Not employed/retired	≤35,000 XOF	Outside OUA	Daily	1 - 2 km	Yes	Insecurity & risk of crime	Shade	Ressources production	Moderately supportive	Community involvement
156	male	>50	secondary school	Employed	not pronounced	Ouagadougou (OUA)	Daily	1 - 2 km	No	Insecurity & risk of crime	Shade	Ressources production	Moderately supportive	Job creation
159	male	18-30	secondary school	Not employed/retired	35,000 - 200,000 XOF	Outside OUA	Daily	1 - 2 km	No	Insecurity & risk of crime	Physical activities	Ressources production	Moderately supportive	Community involvement
163	male	18-30	university level or above	Employed	35,000 - 200,000 XOF	Outside OUA	Daily	1 - 2 km	Yes	Risk of disease	Leisure & relaxation	Ressources production	Moderately supportive	Educational scope
172	male	31-50	secondary school	Not employed/retired	35,000 - 200,000 XOF	Outside OUA	Daily	1 - 2 km	No	Risk of disease	Leisure & relaxation	Ressources production	Moderately supportive	Community involvement
175	male	18-30	secondary school	Employed	35,000 - 200,000 XOF	Ouagadougou (OUA)	Daily	1 - 2 km	No	Risk of disease	Physical activities	Ressources production	Moderately supportive	Community involvement
296	male	18-30	university level or above	Student	≤35,000 XOF	Outside OUA	Daily	1 - 2 km	No	Flood mitigation	Social gatherings	Ressources production	Moderately supportive	Job creation
305	male	18-30	secondary school	Employed	35,000 - 200,000 XOF	Ouagadougou (OUA)	Daily	1 - 2 km	No	Urban cooling	Social gatherings	Ressources production	Moderately supportive	Job creation
313	male	18-30	university level or above	Employed	> 200,000 XOF	Ouagadougou (OUA)	Daily	1 - 2 km	No	Flood mitigation	Physical activities	Ressources production	Moderately supportive	Educational scope
360	female	18-30	secondary school	Employed	35,000 - 200,000 XOF	Outside OUA	Daily	1 - 2 km	Yes	Social cohesion	Urban agriculture	Ressources production	Moderately supportive	Educational scope
391	female	18-30	not pronounced	Employed	not pronounced	Outside OUA	Daily	1 - 2 km	No	Urban cooling	Shade	Ressources production	Moderately supportive	Educational scope
2	female	18-30	university level or above	Employed	35,000 - 200,000 XOF	Outside OUA	Daily	0.5 - 1 km	Yes	Recreation & Walking	Physical activities	Ressources production	Moderately supportive	Community involvement
3	female	18-30	university level or above	Student	35,000 - 200,000 XOF	Ouagadougou (OUA)	Daily	0.5 - 1 km	Yes	Recreation & Walking	Social gatherings	Ressources production	Moderately supportive	Integrated with infrastructure and housing
5	male	31-50	university level or above	Employed	> 200,000 XOF	Ouagadougou (OUA)	Daily	0.5 - 1 km	Yes	Urban cooling	Physical activities	Ressources production	Moderately supportive	Educational scope
9	male	18-30	university level or above	Employed	35,000 - 200,000 XOF	Ouagadougou (OUA)	Daily	0.5 - 1 km	Yes	Hygiene & sanitation issues	Physical activities	Ressources production	Moderately supportive	Integrated with infrastructure and housing
40	female	18-30	university level or above	Employed	> 200,000 XOF	Outside OUA	Daily	0.5 - 1 km	Yes	Flood mitigation	Urban agriculture	Ressources production	Moderately supportive	Integrated with infrastructure and housing
43	male	18-30	primary school or below	Employed	> 200,000 XOF	Outside OUA	Daily	0.5 - 1 km	Yes	Hygiene & sanitation issues	Physical activities	Ressources production	Moderately supportive	Educational scope
78	male	18-30	secondary school	Employed	35,000 - 200,000 XOF	Outside OUA	Daily	0.5 - 1 km	No	Flood mitigation	Physical activities	Ressources production	Moderately supportive	Community involvement
82	female	18-30	university level or above	Employed	35,000 - 200,000 XOF	Outside OUA	Daily	0.5 - 1 km	No	Flood mitigation	Leisure & relaxation	Ressources production	Moderately supportive	Community involvement
147	female	18-30	secondary school	Student	not pronounced	Ouagadougou (OUA)	Daily	0.5 - 1 km	No	Hygiene & sanitation issues	Leisure & relaxation	Ressources production	Moderately supportive	Community involvement
169	female	18-30	university level or above	Not employed/retired	35,000 - 200,000 XOF	Ouagadougou (OUA)	Daily	0.5 - 1 km	Yes	Urban cooling	Urban agriculture	Ressources production	Moderately supportive	Integrated with infrastructure and housing
179	male	18-30	secondary school	Employed	35,000 - 200,000 XOF	Outside OUA	Daily	0.5 - 1 km	Yes	Food production	Leisure & relaxation	Ressources production	Moderately supportive	Community involvement
225	male	31-50	university level or above	Not employed/retired	≤35,000 XOF	Ouagadougou (OUA)	Daily	0.5 - 1 km	No	Urban cooling	Traditional medicine	Ressources production	Moderately supportive	Integrated with infrastructure and housing
275	male	18-30	university level or above	Student	≤35,000 XOF	Ouagadougou (OUA)	Daily	0.5 - 1 km	No	Urban cooling	Social gatherings	Ressources production	Moderately supportive	Educational scope
286	male	18-30	university level or above	Employed	35,000 - 200,000 XOF	Outside OUA	Daily	0.5 - 1 km	No	Aesthetic	Social gatherings	Ressources production	Moderately supportive	Community involvement
378	male	31-50	university level or above	Employed	> 200,000 XOF	Ouagadougou (OUA)	Daily	0.5 - 1 km	No	Insecurity & risk of crime	Social gatherings	Ressources production	Moderately supportive	Community involvement
396	male	18-30	not pronounced	Employed	35,000 - 200,000 XOF	Outside OUA	Daily	0.5 - 1 km	No	Recreation & Walking	Traditional medicine	Ressources production	Moderately supportive	Educational scope
397	female	>50	secondary school	Student	≤35,000 XOF	Outside OUA	Daily	0.5 - 1 km	No	Social cohesion	Urban agriculture	Ressources production	Moderately supportive	Job creation
8	female	18-30	not attended	Employed	35,000 - 200,000 XOF	Ouagadougou (OUA)	Daily	> 2 km	No	Aesthetic	Leisure & relaxation	Ressources production	Moderately supportive	Community involvement
47	male	31-50	primary school or below	Not employed/retired	35,000 - 200,000 XOF	Outside OUA	Daily	> 2 km	No	Food production	Physical activities	Ressources production	Moderately supportive	Job creation
87	male	31-50	university level or above	Employed	> 200,000 XOF	Ouagadougou (OUA)	Daily	> 2 km	No	Aesthetic	Physical activities	Ressources production	Moderately supportive	Community involvement
232	female	31-50	not pronounced	Not employed/retired	≤35,000 XOF	Ouagadougou (OUA)	Daily	> 2 km	No	Aesthetic	Urban agriculture	Ressources production	Moderately supportive	Job creation
280	male	18-30	university level or above	Student	35,000 - 200,000 XOF	Ouagadougou (OUA)	Daily	> 2 km	No	Aesthetic	Plants experimental	Ressources production	Moderately supportive	Job creation
304	male	31-50	primary school or below	Employed	≤35,000 XOF	Ouagadougou (OUA)	Daily	> 2 km	No	Insecurity & risk of crime	Urban agriculture	Ressources production	Moderately supportive	Job creation
24	female	18-30	university level or above	Employed	> 200,000 XOF	Outside OUA	Daily	< 0.5 km	Yes	Hygiene & sanitation issues	Urban agriculture	Ressources production	Moderately supportive	Integrated with infrastructure and housing
30	male	18-30	primary school or below	Employed	> 200,000 XOF	Outside OUA	Daily	< 0.5 km	No	Food production	Physical activities	Ressources production	Moderately supportive	Community involvement
34	male	18-30	primary school or below	Employed	35,000 - 200,000 XOF	Outside OUA	Daily	< 0.5 km	No	Food production	Urban agriculture	Ressources production	Moderately supportive	Community involvement
45	male	18-30	university level or above	Employed	> 200,000 XOF	Ouagadougou (OUA)	Daily	< 0.5 km	No	Flood mitigation	Physical activities	Ressources production	Moderately supportive	Educational scope
186	male	31-50	university level or above	Not employed/retired	35,000 - 200,000 XOF	Outside OUA	Daily	< 0.5 km	Yes	Risk of disease	Leisure & relaxation	Ressources production	Moderately supportive	Educational scope
209	female	31-50	university level or above	Employed	not pronounced	Outside OUA	Daily	< 0.5 km	Yes	Food production	Urban agriculture	Ressources production	Moderately supportive	Community involvement
252	male	18-30	secondary school	Employed	not pronounced	Outside OUA	Daily	< 0.5 km	No	Urban cooling	Social gatherings	Ressources production	Moderately supportive	Educational scope
300	male	18-30	university level or above	Student	≤35,000 XOF	Ouagadougou (OUA)	Daily	< 0.5 km	No	Flood mitigation	Social gatherings	Ressources production	Moderately supportive	Job creation
356	male	18-30	university level or above	Student	≤35,000 XOF	Ouagadougou (OUA)	Daily	< 0.5 km	No	Social cohesion	Social gatherings	Ressources production	Moderately supportive	Community involvement
363	male	18-30	secondary school	Employed	35,000 - 200,000 XOF	Outside OUA	Daily	< 0.5 km	Yes	Food production	Traditional medicine	Ressources production	Moderately supportive	Educational scope
390	female	31-50	university level or above	Employed	not pronounced	Outside OUA	Never	0.5 - 1 km	Yes	Recreation & Walking	Shade	Biodiversity	Not supportive	Integrated with infrastructure and housing
385	male	31-50	not pronounced	Employed	not pronounced	Ouagadougou (OUA)	Rarely	< 0.5 km	No	Biodiversity	Traditional medicine	Health/recreation	Not supportive	Integrated with infrastructure and housing
81	male	31-50	secondary school	Employed	35,000 - 200,000 XOF	Ouagadougou (OUA)	Weekly	1 - 2 km	No	Food production	Physical activities	stormwater managment	Not supportive	Educational scope
74	male	18-30	secondary school	Employed	35,000 - 200,000 XOF	Ouagadougou (OUA)	Monthly	1 - 2 km	No	Aesthetic	Leisure & relaxation	Urban heat reduction	Not supportive	Ecourage walking /social interaction
226	male	31-50	secondary school	Employed	35,000 - 200,000 XOF	Outside OUA	Never	1 - 2 km	No	Insecurity & risk of crime	Physical activities	Urban heat reduction	Not supportive	Educational scope
75	male	31-50	secondary school	Employed	35,000 - 200,000 XOF	Outside OUA	Monthly	0.5 - 1 km	No	Flood mitigation	Leisure & relaxation	Urban heat reduction	Not supportive	Ecourage walking /social interaction
249	male	18-30	not attended	Employed	not pronounced	Ouagadougou (OUA)	Monthly	0.5 - 1 km	No	Urban cooling	Social gatherings	Urban heat reduction	Not supportive	Job creation
347	male	18-30	university level or above	Employed	35,000 - 200,000 XOF	Ouagadougou (OUA)	Monthly	0.5 - 1 km	No	Food production	Plants experimental	Urban heat reduction	Not supportive	Educational scope
246	female	>50	secondary school	Student	not pronounced	Outside OUA	Monthly	> 2 km	Yes	Recreation & Walking	Social gatherings	Urban heat reduction	Not supportive	Integrated with infrastructure and housing
218	male	18-30	secondary school	Employed	35,000 - 200,000 XOF	Outside OUA	Never	< 0.5 km	No	Risk of disease	Physical activities	Urban heat reduction	Not supportive	Ecourage walking /social interaction
94	male	31-50	university level or above	Employed	> 200,000 XOF	Ouagadougou (OUA)	Daily	> 2 km	No	Flood mitigation	Physical activities	Ressources production	Not supportive	Job creation
102	female	18-30	university level or above	Student	35,000 - 200,000 XOF	Ouagadougou (OUA)	Rarely	> 2 km	Yes	Recreation & Walking	Leisure & relaxation	Biodiversity	Very supportive	Educational scope
389	female	18-30	secondary school	Employed	35,000 - 200,000 XOF	Ouagadougou (OUA)	Rarely	< 0.5 km	No	Recreation & Walking	Traditional medicine	Biodiversity	Very supportive	Job creation
140	male	18-30	university level or above	Student	≤35,000 XOF	Ouagadougou (OUA)	Never	> 2 km	Yes	Aesthetic	Leisure & relaxation	Biodiversity	Very supportive	Educational scope
220	male	31-50	university level or above	Employed	not pronounced	Outside OUA	Never	> 2 km	Yes	Aesthetic	Traditional medicine	Biodiversity	Very supportive	Integrated with infrastructure and housing
57	male	18-30	not pronounced	Employed	not pronounced	Ouagadougou (OUA)	Rarely	1 - 2 km	Yes	Insecurity & risk of crime	Urban agriculture	Health/recreation	Very supportive	Job creation
64	male	18-30	university level or above	Student	not pronounced	Ouagadougou (OUA)	Rarely	1 - 2 km	No	Aesthetic	Leisure & relaxation	Health/recreation	Very supportive	Job creation
89	male	18-30	not attended	Employed	35,000 - 200,000 XOF	Ouagadougou (OUA)	Rarely	1 - 2 km	No	Hygiene & sanitation issues	Urban agriculture	Health/recreation	Very supportive	Community involvement
92	male	31-50	secondary school	Employed	35,000 - 200,000 XOF	Ouagadougou (OUA)	Rarely	1 - 2 km	No	Urban cooling	Leisure & relaxation	Health/recreation	Very supportive	Job creation
138	female	18-30	not attended	Employed	not pronounced	Ouagadougou (OUA)	Rarely	1 - 2 km	No	Social cohesion	Urban agriculture	Health/recreation	Very supportive	Community involvement
143	male	18-30	not attended	Employed	≤35,000 XOF	Outside OUA	Rarely	1 - 2 km	No	Social cohesion	Leisure & relaxation	Health/recreation	Very supportive	Community involvement
144	male	>50	secondary school	Student	not pronounced	Ouagadougou (OUA)	Rarely	1 - 2 km	No	Social cohesion	Social gatherings	Health/recreation	Very supportive	Ecourage walking /social interaction
158	male	18-30	secondary school	Employed	35,000 - 200,000 XOF	Outside OUA	Rarely	1 - 2 km	No	Insecurity & risk of crime	Leisure & relaxation	Health/recreation	Very supportive	Ecourage walking /social interaction
222	male	18-30	university level or above	Student	35,000 - 200,000 XOF	Outside OUA	Rarely	1 - 2 km	Yes	Recreation & Walking	Plants experimental	Health/recreation	Very supportive	Educational scope
307	male	31-50	primary school or below	Not employed/retired	not pronounced	Ouagadougou (OUA)	Rarely	1 - 2 km	No	Biodiversity	Shade	Health/recreation	Very supportive	Job creation
311	male	18-30	secondary school	Employed	35,000 - 200,000 XOF	Ouagadougou (OUA)	Rarely	1 - 2 km	No	Urban cooling	Traditional medicine	Health/recreation	Very supportive	Job creation
377	female	18-30	secondary school	Employed	35,000 - 200,000 XOF	Ouagadougou (OUA)	Rarely	1 - 2 km	No	Recreation & Walking	Traditional medicine	Health/recreation	Very supportive	Integrated with infrastructure and housing
52	male	31-50	not pronounced	Employed	35,000 - 200,000 XOF	Ouagadougou (OUA)	Rarely	0.5 - 1 km	No	Flood mitigation	Urban agriculture	Health/recreation	Very supportive	Job creation
63	male	31-50	not pronounced	Employed	not pronounced	Ouagadougou (OUA)	Rarely	> 2 km	No	Biodiversity	Shade	Health/recreation	Very supportive	Job creation
154	female	18-30	secondary school	Student	not pronounced	Ouagadougou (OUA)	Rarely	> 2 km	No	Recreation & Walking	Social gatherings	Health/recreation	Very supportive	Ecourage walking /social interaction
245	male	31-50	not attended	Employed	not pronounced	Ouagadougou (OUA)	Rarely	> 2 km	No	Food production	Traditional medicine	Health/recreation	Very supportive	Job creation
302	male	18-30	secondary school	Employed	not pronounced	Outside OUA	Rarely	> 2 km	No	Biodiversity	Social gatherings	Health/recreation	Very supportive	Job creation
83	male	31-50	university level or above	Employed	> 200,000 XOF	Ouagadougou (OUA)	Weekly	1 - 2 km	No	Food production	Shade	stormwater managment	Very supportive	Educational scope
146	male	31-50	secondary school	Employed	35,000 - 200,000 XOF	Outside OUA	Weekly	1 - 2 km	No	Social cohesion	Leisure & relaxation	stormwater managment	Very supportive	Educational scope
151	male	31-50	university level or above	Student	≤35,000 XOF	Ouagadougou (OUA)	Weekly	1 - 2 km	No	Hygiene & sanitation issues	Social gatherings	stormwater managment	Very supportive	Ecourage walking /social interaction
187	male	18-30	secondary school	Employed	35,000 - 200,000 XOF	Outside OUA	Weekly	1 - 2 km	Yes	Hygiene & sanitation issues	Leisure & relaxation	stormwater managment	Very supportive	Ecourage walking /social interaction
194	male	31-50	not pronounced	Not employed/retired	not pronounced	Ouagadougou (OUA)	Weekly	1 - 2 km	No	Risk of disease	Traditional medicine	stormwater managment	Very supportive	Job creation
103	female	18-30	secondary school	Student	≤35,000 XOF	Outside OUA	Monthly	1 - 2 km	No	Hygiene & sanitation issues	Leisure & relaxation	Urban heat reduction	Very supportive	Ecourage walking /social interaction
106	male	18-30	university level or above	Employed	35,000 - 200,000 XOF	Ouagadougou (OUA)	Monthly	1 - 2 km	No	Hygiene & sanitation issues	Physical activities	Urban heat reduction	Very supportive	Ecourage walking /social interaction
129	male	18-30	secondary school	Student	not pronounced	Outside OUA	Never	1 - 2 km	No	Hygiene & sanitation issues	Leisure & relaxation	Urban heat reduction	Very supportive	Job creation
132	female	18-30	secondary school	Employed	35,000 - 200,000 XOF	Ouagadougou (OUA)	Never	1 - 2 km	No	Hygiene & sanitation issues	Physical activities	Urban heat reduction	Very supportive	Ecourage walking /social interaction
152	male	18-30	not attended	Not employed/retired	≤35,000 XOF	Outside OUA	Never	1 - 2 km	No	Social cohesion	Temporary housing	Urban heat reduction	Very supportive	Community involvement
183	male	18-30	university level or above	Student	≤35,000 XOF	Ouagadougou (OUA)	Never	1 - 2 km	No	Hygiene & sanitation issues	Leisure & relaxation	Urban heat reduction	Very supportive	Ecourage walking /social interaction
195	female	31-50	university level or above	Student	not pronounced	Outside OUA	Never	1 - 2 km	No	Risk of disease	Urban agriculture	Urban heat reduction	Very supportive	Job creation
196	male	18-30	university level or above	Student	not pronounced	Ouagadougou (OUA)	Monthly	1 - 2 km	No	Flood mitigation	Physical activities	Urban heat reduction	Very supportive	Ecourage walking /social interaction
234	male	18-30	university level or above	Employed	> 200,000 XOF	Outside OUA	Never	1 - 2 km	No	Flood mitigation	Physical activities	Urban heat reduction	Very supportive	Educational scope
235	male	18-30	university level or above	Not employed/retired	35,000 - 200,000 XOF	Outside OUA	Never	1 - 2 km	No	Flood mitigation	Leisure & relaxation	Urban heat reduction	Very supportive	Job creation
243	male	18-30	secondary school	Student	not pronounced	Outside OUA	Monthly	1 - 2 km	No	Urban cooling	Social gatherings	Urban heat reduction	Very supportive	Integrated with infrastructure and housing
256	female	18-30	secondary school	Employed	≤35,000 XOF	Ouagadougou (OUA)	Monthly	1 - 2 km	Yes	Urban cooling	Plants experimental	Urban heat reduction	Very supportive	Job creation
257	female	18-30	secondary school	Employed	not pronounced	Outside OUA	Monthly	1 - 2 km	No	Insecurity & risk of crime	Urban agriculture	Urban heat reduction	Very supportive	Job creation
259	female	18-30	secondary school	Employed	35,000 - 200,000 XOF	Outside OUA	Monthly	1 - 2 km	Yes	Insecurity & risk of crime	Physical activities	Urban heat reduction	Very supportive	Educational scope
265	male	18-30	secondary school	Employed	35,000 - 200,000 XOF	Ouagadougou (OUA)	Monthly	1 - 2 km	Yes	Insecurity & risk of crime	Physical activities	Urban heat reduction	Very supportive	Educational scope
287	male	31-50	secondary school	Employed	35,000 - 200,000 XOF	Outside OUA	Monthly	1 - 2 km	No	Flood mitigation	Social gatherings	Urban heat reduction	Very supportive	Ecourage walking /social interaction
288	male	18-30	university level or above	Employed	≤35,000 XOF	Outside OUA	Monthly	1 - 2 km	No	Flood mitigation	Social gatherings	Urban heat reduction	Very supportive	Job creation
314	female	>50	secondary school	Student	not pronounced	Ouagadougou (OUA)	Monthly	1 - 2 km	No	Urban cooling	Physical activities	Urban heat reduction	Very supportive	Ecourage walking /social interaction
316	male	18-30	secondary school	Employed	35,000 - 200,000 XOF	Ouagadougou (OUA)	Monthly	1 - 2 km	No	Biodiversity	Plants experimental	Urban heat reduction	Very supportive	Job creation
321	male	18-30	secondary school	Employed	not pronounced	Ouagadougou (OUA)	Monthly	1 - 2 km	No	Flood mitigation	Social gatherings	Urban heat reduction	Very supportive	Ecourage walking /social interaction
330	female	18-30	secondary school	Employed	≤35,000 XOF	Ouagadougou (OUA)	Monthly	1 - 2 km	No	Flood mitigation	Traditional medicine	Urban heat reduction	Very supportive	Ecourage walking /social interaction
349	male	18-30	secondary school	Employed	35,000 - 200,000 XOF	Outside OUA	Monthly	1 - 2 km	No	Food production	Traditional medicine	Urban heat reduction	Very supportive	Ecourage walking /social interaction
383	female	31-50	not pronounced	Student	not pronounced	Ouagadougou (OUA)	Monthly	1 - 2 km	No	Recreation & Walking	Social gatherings	Urban heat reduction	Very supportive	Integrated with infrastructure and housing
384	male	18-30	secondary school	Employed	not pronounced	Outside OUA	Monthly	1 - 2 km	No	Recreation & Walking	Plants experimental	Urban heat reduction	Very supportive	Educational scope
387	male	18-30	university level or above	Employed	not pronounced	Ouagadougou (OUA)	Monthly	1 - 2 km	No	Recreation & Walking	Social gatherings	Urban heat reduction	Very supportive	Job creation
393	male	18-30	university level or above	Student	35,000 - 200,000 XOF	Ouagadougou (OUA)	Monthly	1 - 2 km	No	Urban cooling	Leisure & relaxation	Urban heat reduction	Very supportive	Ecourage walking /social interaction
93	female	31-50	secondary school	Employed	> 200,000 XOF	Ouagadougou (OUA)	Monthly	0.5 - 1 km	No	Insecurity & risk of crime	Physical activities	Urban heat reduction	Very supportive	Integrated with infrastructure and housing
100	male	18-30	secondary school	Student	≤35,000 XOF	Ouagadougou (OUA)	Monthly	0.5 - 1 km	No	Food production	Leisure & relaxation	Urban heat reduction	Very supportive	Job creation
192	male	18-30	university level or above	Employed	not pronounced	Ouagadougou (OUA)	Monthly	0.5 - 1 km	No	Flood mitigation	Leisure & relaxation	Urban heat reduction	Very supportive	Job creation
200	male	18-30	not pronounced	Employed	not pronounced	Ouagadougou (OUA)	Monthly	0.5 - 1 km	No	Flood mitigation	Horticulture	Urban heat reduction	Very supportive	Job creation
210	female	31-50	not pronounced	Not employed/retired	not pronounced	Ouagadougou (OUA)	Monthly	0.5 - 1 km	No	Urban cooling	Household waste storage	Urban heat reduction	Very supportive	Job creation
263	male	18-30	secondary school	Employed	35,000 - 200,000 XOF	Ouagadougou (OUA)	Monthly	0.5 - 1 km	No	Food production	Physical activities	Urban heat reduction	Very supportive	Educational scope
297	male	18-30	university level or above	Student	≤35,000 XOF	Ouagadougou (OUA)	Monthly	0.5 - 1 km	No	Urban cooling	Physical activities	Urban heat reduction	Very supportive	Educational scope
399	female	18-30	not pronounced	Employed	not pronounced	Ouagadougou (OUA)	Monthly	0.5 - 1 km	No	Aesthetic	Social gatherings	Urban heat reduction	Very supportive	Job creation
400	female	18-30	not pronounced	Employed	not pronounced	Ouagadougou (OUA)	Monthly	0.5 - 1 km	No	Social cohesion	Leisure & relaxation	Urban heat reduction	Very supportive	Integrated with infrastructure and housing
401	male	18-30	not pronounced	Student	≤35,000 XOF	Outside OUA	Monthly	0.5 - 1 km	No	Recreation & Walking	Social gatherings	Urban heat reduction	Very supportive	Educational scope
6	female	31-50	not attended	Not employed/retired	35,000 - 200,000 XOF	Ouagadougou (OUA)	Monthly	> 2 km	No	Recreation & Walking	Urban agriculture	Urban heat reduction	Very supportive	Community involvement
51	male	18-30	not attended	Employed	35,000 - 200,000 XOF	Ouagadougou (OUA)	Monthly	> 2 km	No	Recreation & Walking	Urban agriculture	Urban heat reduction	Very supportive	Job creation
61	male	18-30	not pronounced	Employed	not pronounced	Ouagadougou (OUA)	Monthly	> 2 km	No	Risk of disease	Urban agriculture	Urban heat reduction	Very supportive	Job creation
66	male	18-30	not pronounced	Employed	not pronounced	Outside OUA	Monthly	> 2 km	No	Social cohesion	Urban agriculture	Urban heat reduction	Very supportive	Community involvement
67	male	31-50	not pronounced	Employed	not pronounced	Outside OUA	Monthly	> 2 km	No	Social cohesion	Shade	Urban heat reduction	Very supportive	Job creation
68	male	18-30	not pronounced	Employed	not pronounced	Outside OUA	Monthly	> 2 km	No	Social cohesion	Horticulture	Urban heat reduction	Very supportive	Job creation
72	male	18-30	university level or above	Student	not pronounced	Ouagadougou (OUA)	Monthly	> 2 km	No	Aesthetic	Leisure & relaxation	Urban heat reduction	Very supportive	Job creation
98	male	18-30	university level or above	Employed	35,000 - 200,000 XOF	Outside OUA	Monthly	> 2 km	Yes	Aesthetic	Leisure & relaxation	Urban heat reduction	Very supportive	Ecourage walking /social interaction
99	male	18-30	university level or above	Employed	35,000 - 200,000 XOF	Outside OUA	Monthly	> 2 km	No	Flood mitigation	Leisure & relaxation	Urban heat reduction	Very supportive	Ecourage walking /social interaction
101	male	18-30	university level or above	Student	35,000 - 200,000 XOF	Outside OUA	Monthly	> 2 km	No	Aesthetic	Leisure & relaxation	Urban heat reduction	Very supportive	Ecourage walking /social interaction
104	male	18-30	secondary school	Employed	35,000 - 200,000 XOF	Outside OUA	Monthly	> 2 km	No	Flood mitigation	Physical activities	Urban heat reduction	Very supportive	Job creation
118	male	31-50	university level or above	Employed	> 200,000 XOF	Outside OUA	Monthly	> 2 km	Yes	Flood mitigation	Physical activities	Urban heat reduction	Very supportive	Ecourage walking /social interaction
119	male	31-50	university level or above	Employed	> 200,000 XOF	Outside OUA	Monthly	> 2 km	Yes	Aesthetic	Physical activities	Urban heat reduction	Very supportive	Ecourage walking /social interaction
123	male	18-30	secondary school	Employed	35,000 - 200,000 XOF	Ouagadougou (OUA)	Monthly	> 2 km	Yes	Risk of disease	Leisure & relaxation	Urban heat reduction	Very supportive	Ecourage walking /social interaction
124	male	18-30	not attended	Employed	35,000 - 200,000 XOF	Ouagadougou (OUA)	Monthly	> 2 km	Yes	Flood mitigation	Physical activities	Urban heat reduction	Very supportive	Community involvement
127	female	18-30	university level or above	Student	not pronounced	Outside OUA	Monthly	> 2 km	No	Recreation & Walking	Leisure & relaxation	Urban heat reduction	Very supportive	Ecourage walking /social interaction
136	male	18-30	university level or above	Student	not pronounced	Outside OUA	Monthly	> 2 km	No	Aesthetic	Leisure & relaxation	Urban heat reduction	Very supportive	Ecourage walking /social interaction
161	male	18-30	university level or above	Student	35,000 - 200,000 XOF	Outside OUA	Never	> 2 km	No	Aesthetic	Plants experimental	Urban heat reduction	Very supportive	Ecourage walking /social interaction
165	female	18-30	not attended	Not employed/retired	≤35,000 XOF	Ouagadougou (OUA)	Weekly	> 2 km	No	Risk of disease	Household waste storage	Urban heat reduction	Very supportive	Community involvement
198	female	18-30	university level or above	Student	not pronounced	Ouagadougou (OUA)	Monthly	> 2 km	No	Aesthetic	Physical activities	Urban heat reduction	Very supportive	Job creation
208	male	18-30	university level or above	Student	not pronounced	Ouagadougou (OUA)	Monthly	> 2 km	No	Aesthetic	Physical activities	Urban heat reduction	Very supportive	Job creation
221	male	18-30	university level or above	Student	35,000 - 200,000 XOF	Outside OUA	Monthly	> 2 km	No	Aesthetic	Plants experimental	Urban heat reduction	Very supportive	Ecourage walking /social interaction
231	female	>50	secondary school	Student	≤35,000 XOF	Ouagadougou (OUA)	Monthly	> 2 km	No	Urban cooling	Social gatherings	Urban heat reduction	Very supportive	Ecourage walking /social interaction
236	male	18-30	university level or above	Not employed/retired	35,000 - 200,000 XOF	Ouagadougou (OUA)	Monthly	> 2 km	No	Recreation & Walking	Physical activities	Urban heat reduction	Very supportive	Job creation
241	male	31-50	not pronounced	Employed	not pronounced	Ouagadougou (OUA)	Monthly	> 2 km	No	Risk of disease	Traditional medicine	Urban heat reduction	Very supportive	Community involvement
248	male	18-30	university level or above	Employed	not pronounced	Outside OUA	Monthly	> 2 km	No	Risk of disease	Social gatherings	Urban heat reduction	Very supportive	Job creation
267	male	31-50	secondary school	Employed	35,000 - 200,000 XOF	Ouagadougou (OUA)	Monthly	> 2 km	No	Recreation & Walking	Social gatherings	Urban heat reduction	Very supportive	Job creation
269	male	31-50	secondary school	Employed	35,000 - 200,000 XOF	Outside OUA	Monthly	> 2 km	No	Risk of disease	Social gatherings	Urban heat reduction	Very supportive	Job creation
276	female	18-30	secondary school	Employed	35,000 - 200,000 XOF	Outside OUA	Monthly	> 2 km	No	Insecurity & risk of crime	Physical activities	Urban heat reduction	Very supportive	Job creation
278	female	18-30	secondary school	Employed	≤35,000 XOF	Ouagadougou (OUA)	Monthly	> 2 km	No	Biodiversity	Social gatherings	Urban heat reduction	Very supportive	Job creation
285	male	>50	secondary school	Not employed/retired	≤35,000 XOF	Outside OUA	Monthly	> 2 km	No	Recreation & Walking	Shade	Urban heat reduction	Very supportive	Ecourage walking /social interaction
291	male	18-30	secondary school	Employed	≤35,000 XOF	Outside OUA	Monthly	> 2 km	No	Food production	Social gatherings	Urban heat reduction	Very supportive	Ecourage walking /social interaction
292	male	18-30	secondary school	Student	≤35,000 XOF	Outside OUA	Weekly	> 2 km	No	Insecurity & risk of crime	Physical activities	Urban heat reduction	Very supportive	Job creation
293	male	18-30	secondary school	Employed	35,000 - 200,000 XOF	Ouagadougou (OUA)	Weekly	> 2 km	No	Insecurity & risk of crime	Physical activities	Urban heat reduction	Very supportive	Job creation
295	male	>50	secondary school	Employed	35,000 - 200,000 XOF	Ouagadougou (OUA)	Monthly	> 2 km	No	Recreation & Walking	Horticulture	Urban heat reduction	Very supportive	Ecourage walking /social interaction
303	male	18-30	secondary school	Employed	35,000 - 200,000 XOF	Ouagadougou (OUA)	Weekly	> 2 km	No	Insecurity & risk of crime	Social gatherings	Urban heat reduction	Very supportive	Job creation
306	male	18-30	secondary school	Employed	35,000 - 200,000 XOF	Outside OUA	Monthly	> 2 km	No	Food production	Social gatherings	Urban heat reduction	Very supportive	Ecourage walking /social interaction
317	female	18-30	university level or above	Employed	35,000 - 200,000 XOF	Ouagadougou (OUA)	Monthly	> 2 km	No	Aesthetic	Traditional medicine	Urban heat reduction	Very supportive	Ecourage walking /social interaction
319	male	31-50	secondary school	Employed	35,000 - 200,000 XOF	Ouagadougou (OUA)	Monthly	> 2 km	Yes	Insecurity & risk of crime	Social gatherings	Urban heat reduction	Very supportive	Ecourage walking /social interaction
322	female	18-30	university level or above	Student	not pronounced	Ouagadougou (OUA)	Monthly	> 2 km	Yes	Aesthetic	Urban agriculture	Urban heat reduction	Very supportive	Ecourage walking /social interaction
323	male	18-30	university level or above	Student	35,000 - 200,000 XOF	Outside OUA	Monthly	> 2 km	Yes	Aesthetic	Plants experimental	Urban heat reduction	Very supportive	Ecourage walking /social interaction
326	male	18-30	secondary school	Employed	35,000 - 200,000 XOF	Outside OUA	Monthly	> 2 km	No	Hygiene & sanitation issues	Social gatherings	Urban heat reduction	Very supportive	Job creation
381	male	18-30	not attended	Employed	not pronounced	Ouagadougou (OUA)	Never	> 2 km	No	Biodiversity	Traditional medicine	Urban heat reduction	Very supportive	Job creation
56	male	18-30	not pronounced	Employed	not pronounced	Ouagadougou (OUA)	Monthly	< 0.5 km	No	Risk of disease	Urban agriculture	Urban heat reduction	Very supportive	Job creation
65	male	31-50	not pronounced	Not employed/retired	not pronounced	Outside OUA	Monthly	< 0.5 km	No	Hygiene & sanitation issues	Shade	Urban heat reduction	Very supportive	Job creation
96	female	18-30	secondary school	Student	≤35,000 XOF	Outside OUA	Monthly	< 0.5 km	No	Urban cooling	Urban agriculture	Urban heat reduction	Very supportive	Ecourage walking /social interaction
107	male	18-30	secondary school	Employed	not pronounced	Outside OUA	Weekly	< 0.5 km	No	Urban cooling	Leisure & relaxation	Urban heat reduction	Very supportive	Ecourage walking /social interaction
113	male	18-30	university level or above	Employed	35,000 - 200,000 XOF	Ouagadougou (OUA)	Weekly	< 0.5 km	No	Urban cooling	Leisure & relaxation	Urban heat reduction	Very supportive	Ecourage walking /social interaction
191	male	31-50	not pronounced	Not employed/retired	not pronounced	Ouagadougou (OUA)	Monthly	< 0.5 km	No	Risk of disease	Traditional medicine	Urban heat reduction	Very supportive	Job creation
197	female	18-30	university level or above	Student	not pronounced	Ouagadougou (OUA)	Monthly	< 0.5 km	No	Aesthetic	Leisure & relaxation	Urban heat reduction	Very supportive	Job creation
199	female	18-30	secondary school	Employed	not pronounced	Outside OUA	Monthly	< 0.5 km	No	Recreation & Walking	Leisure & relaxation	Urban heat reduction	Very supportive	Job creation
203	female	18-30	not pronounced	Employed	≤35,000 XOF	Outside OUA	Monthly	< 0.5 km	No	Aesthetic	Urban agriculture	Urban heat reduction	Very supportive	Job creation
206	male	18-30	secondary school	Student	not pronounced	Outside OUA	Monthly	< 0.5 km	No	Flood mitigation	Plants experimental	Urban heat reduction	Very supportive	Job creation
211	female	31-50	not attended	Not employed/retired	not pronounced	Outside OUA	Monthly	< 0.5 km	No	Recreation & Walking	Shade	Urban heat reduction	Very supportive	Job creation
215	female	18-30	not attended	Not employed/retired	not pronounced	Outside OUA	Monthly	< 0.5 km	No	Recreation & Walking	Traditional medicine	Urban heat reduction	Very supportive	Job creation
229	male	18-30	secondary school	Employed	35,000 - 200,000 XOF	Ouagadougou (OUA)	Monthly	< 0.5 km	No	Risk of disease	Physical activities	Urban heat reduction	Very supportive	Integrated with infrastructure and housing
250	male	18-30	secondary school	Employed	35,000 - 200,000 XOF	Outside OUA	Monthly	< 0.5 km	Yes	Biodiversity	Social gatherings	Urban heat reduction	Very supportive	Job creation
262	male	18-30	secondary school	Employed	not pronounced	Outside OUA	Monthly	< 0.5 km	No	Insecurity & risk of crime	Physical activities	Urban heat reduction	Very supportive	Ecourage walking /social interaction
264	male	18-30	not attended	Employed	not pronounced	Outside OUA	Never	< 0.5 km	No	Insecurity & risk of crime	Social gatherings	Urban heat reduction	Very supportive	Job creation
27	female	>50	secondary school	Student	≤35,000 XOF	Outside OUA	Daily	1 - 2 km	Yes	Flood mitigation	Traditional medicine	Ressources production	Very supportive	Community involvement
62	male	18-30	not pronounced	Employed	not pronounced	Ouagadougou (OUA)	Daily	1 - 2 km	No	Aesthetic	Urban agriculture	Ressources production	Very supportive	Job creation
88	male	18-30	secondary school	Student	≤35,000 XOF	Ouagadougou (OUA)	Daily	1 - 2 km	No	Hygiene & sanitation issues	Leisure & relaxation	Ressources production	Very supportive	Community involvement
216	female	18-30	university level or above	Employed	35,000 - 200,000 XOF	Outside OUA	Daily	1 - 2 km	No	Social cohesion	Urban agriculture	Ressources production	Very supportive	Educational scope
308	male	31-50	university level or above	Employed	> 200,000 XOF	Ouagadougou (OUA)	Daily	1 - 2 km	No	Biodiversity	Physical activities	Ressources production	Very supportive	Community involvement
339	male	18-30	secondary school	Employed	35,000 - 200,000 XOF	Outside OUA	Daily	1 - 2 km	No	Social cohesion	Plants experimental	Ressources production	Very supportive	Job creation
60	male	18-30	university level or above	Student	not pronounced	Outside OUA	Daily	0.5 - 1 km	No	Hygiene & sanitation issues	Social gatherings	Ressources production	Very supportive	Educational scope
219	male	31-50	not pronounced	Employed	35,000 - 200,000 XOF	Outside OUA	Daily	0.5 - 1 km	No	Urban cooling	Physical activities	Ressources production	Very supportive	Job creation
253	male	31-50	secondary school	Employed	> 200,000 XOF	Ouagadougou (OUA)	Daily	0.5 - 1 km	Yes	Social cohesion	Physical activities	Ressources production	Very supportive	Integrated with infrastructure and housing
55	male	31-50	not pronounced	Not employed/retired	not pronounced	Outside OUA	Daily	> 2 km	No	Recreation & Walking	Shade	Ressources production	Very supportive	Job creation
193	male	18-30	university level or above	Not employed/retired	not pronounced	Outside OUA	Daily	> 2 km	No	Aesthetic	Leisure & relaxation	Ressources production	Very supportive	Job creation
282	male	18-30	secondary school	Employed	35,000 - 200,000 XOF	Ouagadougou (OUA)	Daily	> 2 km	No	Recreation & Walking	Physical activities	Ressources production	Very supportive	Community involvement
69	male	31-50	not pronounced	Employed	not pronounced	Outside OUA	Daily	< 0.5 km	No	Hygiene & sanitation issues	Shade	Ressources production	Very supportive	Job creation
315	male	>50	secondary school	Student	≤35,000 XOF	Ouagadougou (OUA)	Daily	< 0.5 km	No	Biodiversity	Horticulture	Ressources production	Very supportive	Job creation
386	male	18-30	university level or above	Student	not pronounced	Outside OUA	Daily	< 0.5 km	No	Aesthetic	Social gatherings	Ressources production	Very supportive	Integrated with infrastructure and housing

## Sheet: pre-analysis
Nombre de index	Étiquettes de colonnes
Étiquettes de lignes	0.5 - 1 km	1 - 2 km	Less than 0.5 km	More than 2 km	Total général		Étiquettes de lignes	Nombre de index
Daily	0.25641	0.168605	0.240741	0.103093	0.179551		Daily	0.179551
Monthly	0.346154	0.401163	0.481481	0.587629	0.446384		Monthly	0.446384
Never	0.0512821	0.0639535	0.0740741	0.0618557	0.0623441		Never	0.0623441
Rarely	0.230769	0.273256	0.0925926	0.175258	0.216958		Rarely	0.216958
Weekly	0.115385	0.0930233	0.111111	0.0721649	0.0947631		Weekly	0.0947631
Total général	1	1	1	1	1		Total général	1
Nombre de index	Étiquettes de colonnes
Étiquettes de lignes	0.5 - 1 km	1 - 2 km	Less than 0.5 km	More than 2 km	Total général
Food supply & economic value	0.166667	0.0930233	0.0740741	0.0824742	0.102244
Aesthetic value	0.0769231	0.0581395	0.0925926	0.268041	0.117207
Cooling function	0.192308	0.116279	0.148148	0.0206186	0.112219
Ecological function	0	0.0581395	0.0740741	0.0721649	0.0523691
Educational function	0.153846	0.127907	0.0555556	0.0824742	0.112219
Hygiene & sanitation issues	0.141026	0.162791	0.111111	0.0618557	0.127182
Insecurity & risk of crime	0.102564	0.0872093	0.111111	0.0824742	0.0922693
Recreational function	0.0641026	0.0581395	0.12963	0.185567	0.0997506
Risk of disease	0	0.0755814	0.111111	0.103093	0.0723192
Social interaction function	0.102564	0.162791	0.0925926	0.0412371	0.112219
Total général	1	1	1	1	1
Nombre de index	Étiquettes de colonnes
Étiquettes de lignes	not attended	not pronounced	primary school or below	secondary school	university level or above	Total général
Food supply & economic value	0.111111	0.0238095	0.25	0.136612	0.0521739	0.102244
Aesthetic value	0.133333	0.119048	0	0.0437158	0.243478	0.117207
Cooling function	0.0888889	0.0952381	0.0625	0.10929	0.13913	0.112219
Ecological function	0.0444444	0.0952381	0.125	0.0491803	0.0347826	0.0523691
Educational function	0.0888889	0.0714286	0.0625	0.114754	0.13913	0.112219
Hygiene & sanitation issues	0.0888889	0.0714286	0.1875	0.136612	0.13913	0.127182
Insecurity & risk of crime	0.0444444	0.0714286	0.125	0.136612	0.0434783	0.0922693
Recreational function	0.111111	0.142857	0.125	0.0928962	0.0869565	0.0997506
Risk of disease	0.0222222	0.214286	0	0.0765027	0.0434783	0.0723192
Social interaction function	0.266667	0.0952381	0.0625	0.103825	0.0782609	0.112219
Total général	1	1	1	1	1	1
Age	(Tous)
Nombre de index	Étiquettes de colonnes
Étiquettes de lignes	female	male	Total général
0.5 - 1 km	0.254717	0.172881	0.194514
1 - 2 km	0.424528	0.430508	0.428928
Less than 0.5 km	0.122642	0.138983	0.134663
More than 2 km	0.198113	0.257627	0.241895
Total général	1	1	1
Employment	(Tous)
Nombre de index	Étiquettes de colonnes
Étiquettes de lignes	>50	18-30	31-50	Total général
Experimental study function	0	0.0818505	0.038835	0.0673317
Horticulture	0.176471	0.0391459	0	0.0349127
Household waste storage	0	0.0142349	0.0194175	0.0149626
Leisure & relaxation	0	0.217082	0.126214	0.184539
Physical activities	0.117647	0.202847	0.242718	0.209476
Social gatherings	0.235294	0.234875	0.0970874	0.199501
Temporary/permanent housing	0	0.0142349	0.00970874	0.0124688
Traditional medicine	0.117647	0.0854093	0.15534	0.104738
Tree shade function	0.176471	0.0142349	0.145631	0.0548628
Urban agriculture	0.176471	0.0960854	0.165049	0.117207
Total général	1	1	1	1
Nombre de index	Étiquettes de colonnes
Étiquettes de lignes	not attended	not pronounced	primary school or below	secondary school	university level or above	Total général
recreation	0.266667	0.214286	0.3125	0.240437	0.147826	0.216958
stormwater managment	0	0.047619	0.0625	0.0710383	0.0782609	0.0623441
support wildlife habitats	0	0	0	0.00546448	0.0521739	0.0174564
urban heat reduction	0.688889	0.571429	0.25	0.540984	0.452174	0.523691
well-being	0.0444444	0.166667	0.375	0.142077	0.269565	0.179551
Total général	1	1	1	1	1	1
NbS_benefits	(Tous)
Nombre de index	Étiquettes de colonnes
Étiquettes de lignes	0.5 - 1 km	1 - 2 km	Less than 0.5 km	More than 2 km	Total général
Experimental study function	0.0641026	0.0697674	0.0555556	0.0721649	0.0673317
Horticulture	0.0512821	0.0174419	0.037037	0.0515464	0.0349127
Household waste storage	0.025641	0.0116279	0.0185185	0.0103093	0.0149626
Leisure & relaxation	0.166667	0.203488	0.203704	0.154639	0.184539
Physical activities	0.230769	0.226744	0.111111	0.216495	0.209476
Social gatherings	0.179487	0.209302	0.203704	0.195876	0.199501
Temporary/permanent housing	0.0128205	0.0174419	0	0.0103093	0.0124688
Traditional medicine	0.0641026	0.104651	0.148148	0.113402	0.104738
Tree shade function	0.0641026	0.0348837	0.0555556	0.0824742	0.0548628
Urban agriculture	0.141026	0.104651	0.166667	0.0927835	0.117207
Total général	1	1	1	1	1
Birthplace	(Tous)
Nombre de index	Étiquettes de colonnes
Étiquettes de lignes	female	male	Total général
Accessibility	0.179245	0.159322	0.164589
Community well-being	0.386792	0.413559	0.406484
Connectivity	0.150943	0.0813559	0.0997506
Integration with existing infrastructure	0.0188679	0.020339	0.0199501
Personal benefit	0.264151	0.325424	0.309227
Total général	1	1	1
Étiquettes de lignes	Nombre de index
Moderately supportive	0.633416
Not supportive	0.0274314
Very supportive	0.339152
Total général	1
